# Supplementary material for: Utrophin up-regulation by artificial transcription factors induces muscle rescue and impacts the neuromuscular junction in mdx mice
Source: PubMed Central journal article supplement — Biochim Biophys Acta. 2018 Apr;1864(4Part A):1172–82. doi: 10.1016/j.bbadis.2018.01.030 (PMC5851675; doi:10.1016/j.bbadis.2018.01.030), 2018-04
Supplement: mmc3.pdf [file mmc3.pdf]

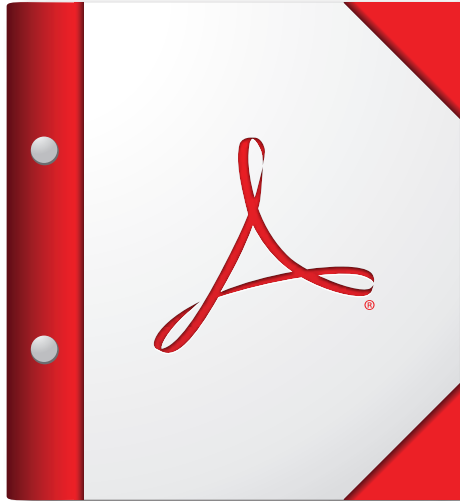

**For the best experience, open this PDF portfolio in  
Acrobat 9 or Adobe Reader 9, or later.**

[Get Adobe Reader Now!](#)
