# Supplementary figures and images for: Utrophin up-regulation by artificial transcription factors induces muscle rescue and impacts the neuromuscular junction in mdx mice
Source: PubMed Central journal article supplement — Biochim Biophys Acta. 2018 Apr;1864(4Part A):1172–82. doi: 10.1016/j.bbadis.2018.01.030 (PMC5851675; doi:10.1016/j.bbadis.2018.01.030), 2018-04

**A**

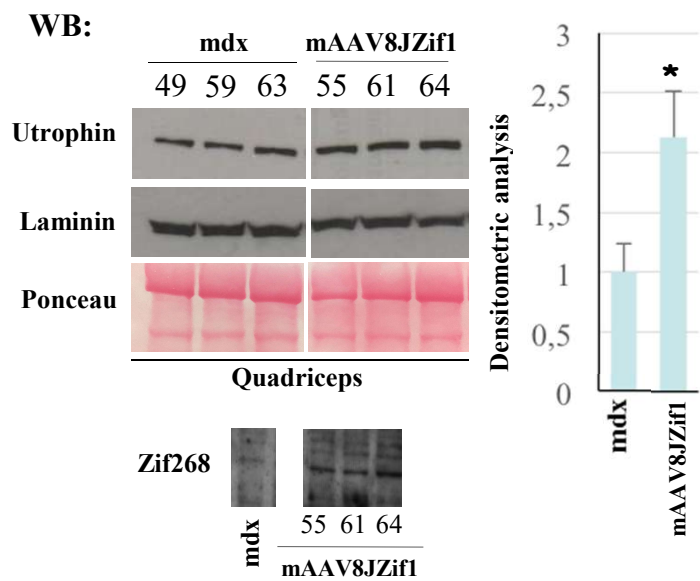

**B**

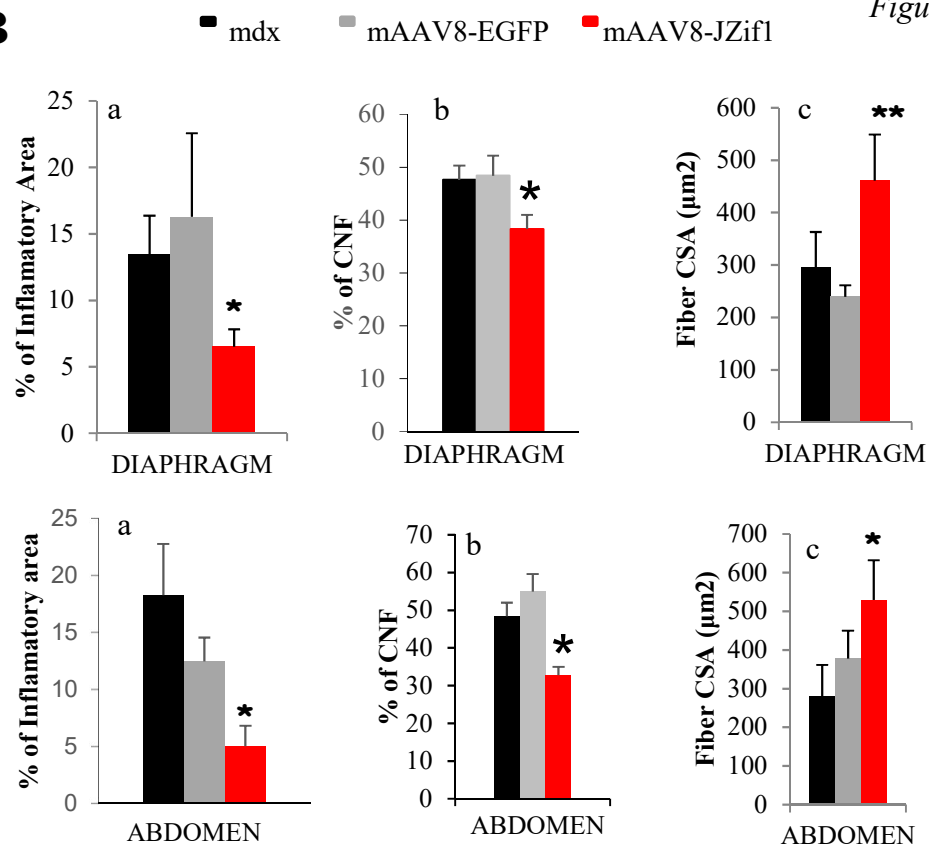

**C**

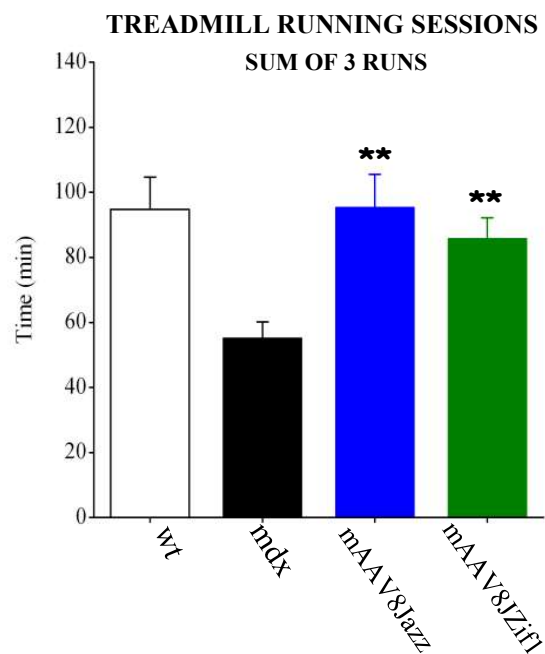

**D**

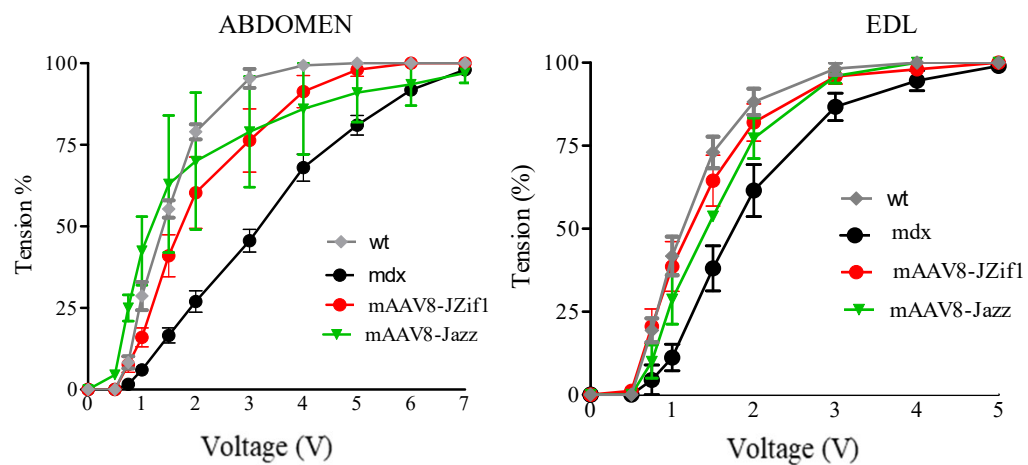

Supplement: mmc1.pdf [file mmc1.pdf]

A

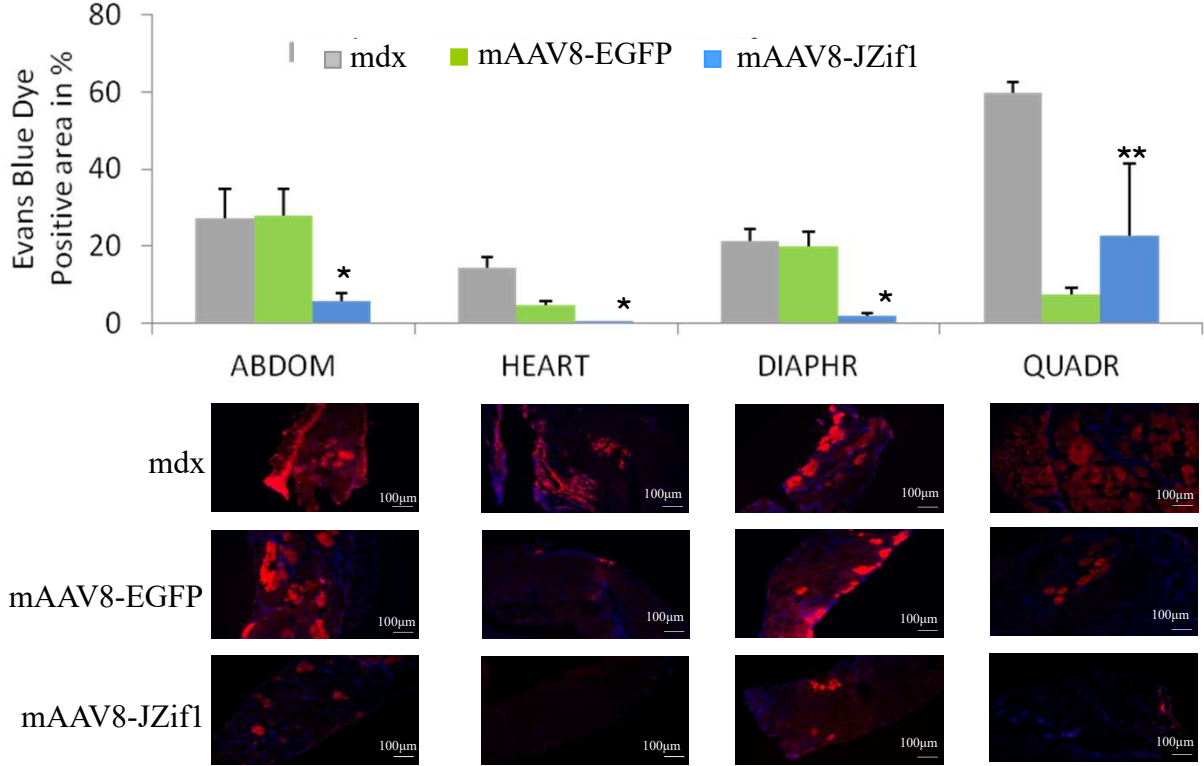

B

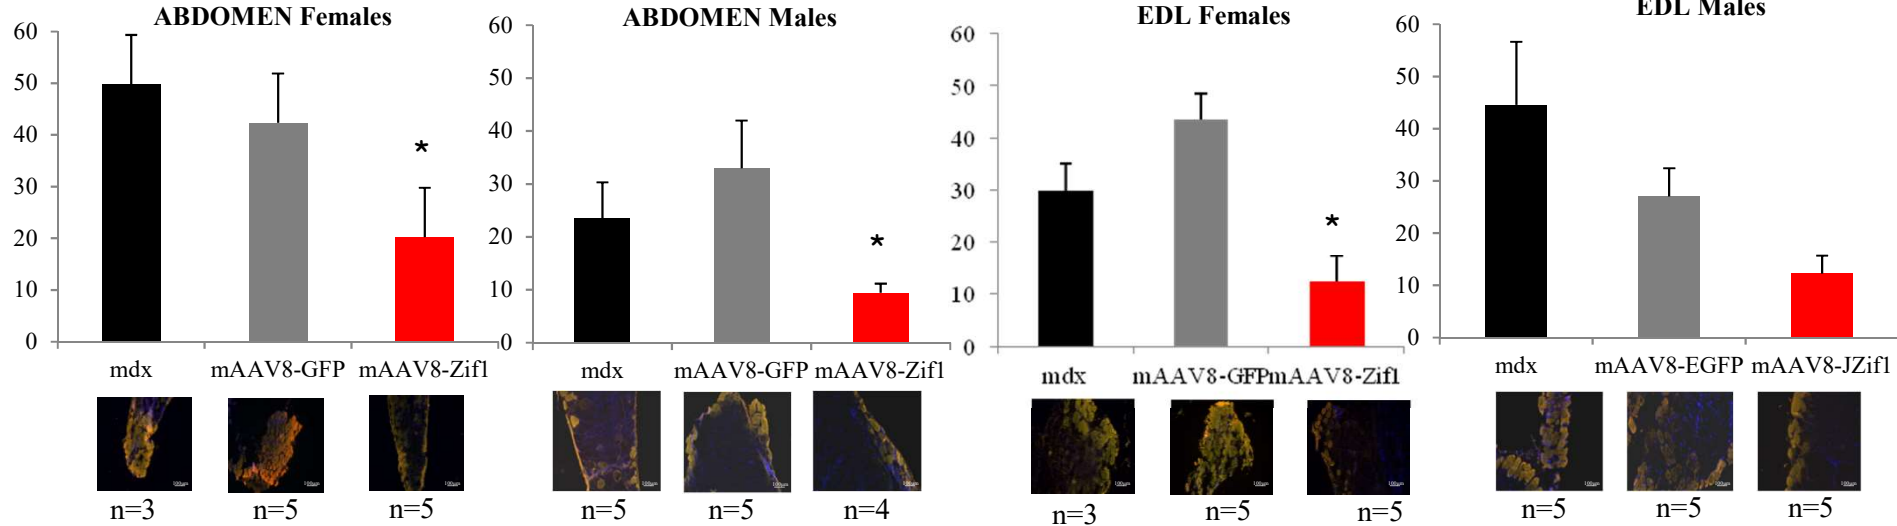

Supplement: mmc2.pdf [file mmc2.pdf]
